# Supplementary material for: Metabolite profiling from the fermentation of marine-derived extracts by Lactobacillus acidophilus LB
Source: PeerJ. 2025 Dec 3;13:e20399. doi: 10.7717/peerj.20399 (PMC12681230; doi:10.7717/peerj.20399)
Supplement: Supplemental Information 2 [file peerj-13-20399-s002.xlsx]

## Sheet: Sheet1
sample	6-Gingerol	6'-O-trans-p-Coumaroyloleuropein	Andrographatoside	Auraptenol	Cholic acid	Daturametelin B	Methyl lucidenate Q	Nigakihemiacetal F	Songorine	Sulfoorientalol C	Tetratriacontanamine
B.Spi	51907.1	0	0	0	16623.7	0	0	5533.09	37484.2	0	0
S.Spi	0	505165	14897.3	19494.8	11935.2	29161.6	462205	0	0	69541.6	9878.28
B.Ulva	0	99793.1	12517.1	8268.8	0	13876.9	451976	0	0	64474.8	9537.26
S.Ulva	0	0	7710.72	6200.77	0	11419.9	497666	0	0	0	9315.33
B.Caulerpa	105334	0	8512.02	14357.3	16480.3	15036.6	0	17250.9	37318.2	0	0
S.Caulerpa	117293	0	11848.7	14891.2	15981.7	20490.3	440410	41201.1	30396.1	0	0
B.SPi-LBA	13754.5	58794	0	0	0	0	535090	0	0	61236	9580.95
S.SPi-LBA	92298.1	0	9899.41	12133	16869.3	17728.1	530866	33556.8	28898.1	0	0
B.Ulva-LBA	179029	420414	27345	48850.6	0	66456.5	0	0	0	57779.3	10195.2
S.Ulva-LBA	40062.1	433036	0	0	12902.1	0	643503	0	0	66514.6	0
B.Caulerpa-LBA	80485.6	0	8269.73	7687.7	16674.2	12548.1	1.02032e+06	46483.7	39308.3	0	0
S.Caulerpa-LBA	0	115813	11378.4	8549.58	0	13857.8	413038	0	0	56337	9304.87
B.MRS-LBA	13212.9	56558.7	0	0	0	0	561855	0	0	65304.8	9722.8
S.MRS-LBA	67699.4	0	0	0	18014.2	0	0	32271.1	50440.6	0	0
